# Supplementary material for: Sclerostin aggravates cardiac remodeling after myocardial infarction by inhibition of Wnt/β-catenin signaling pathway
Source: PubMed Central journal article supplement — J Thorac Dis. 2022 May;14(5):1563–77. doi: 10.21037/jtd-22-473 (PMC9186236; doi:10.21037/jtd-22-473), 2022-05
Supplement: jtd-14-05-1563-dss.pdf [file jtd-14-05-1563-dss.pdf]

## Data Sharing Statement

|                     |                                                                                                                                                     |                                                                                                                       |
|---------------------|-----------------------------------------------------------------------------------------------------------------------------------------------------|-----------------------------------------------------------------------------------------------------------------------|
| <b>Article Info</b> | <a href="https://dx.doi.org/10.21037/jtd-22-473">https://dx.doi.org/10.21037/jtd-22-473</a>                                                         |                                                                                                                       |
| <b>Item</b>         | <b>Question</b>                                                                                                                                     | <b>Authors' Response<br/>(place "-" if not applicable)</b>                                                            |
| 1                   | Would you like to share data collected for your study to others?                                                                                    | Yes                                                                                                                   |
| 2                   | If not, would you like to share the reason for your decision?                                                                                       | -                                                                                                                     |
| 3                   | What data in particular will be shared?                                                                                                             | Basic data in the "Results" section of the paper (Main text, tables, figures and attachments).                        |
| 4                   | Any other documents will be shared? Such as study protocol, statistical analysis plan, informed consent form, clinical study report, analytic code. | Statistical analysis plan and study report will also be shared if requested.                                          |
| 5                   | When will data availability begin?                                                                                                                  | From the publication date.                                                                                            |
| 6                   | When will data availability end?                                                                                                                    | Two years within the publication date, since the technique may be updated over time.                                  |
| 7                   | To whom will you share the data?                                                                                                                    | Cardiologist interested in the study of cardiac remodeling after myocardial infarction.                               |
| 8                   | For what type of analysis or purpose?                                                                                                               | For analysis to explore the possible mechanism of cardiac remodeling after myocardial infarction exacerbated by SOST. |
| 9                   | How or where can the data/documents be obtained?                                                                                                    | Emails could be sent to the address below to obtain the shared data:<br>yg-1918@163.com                               |
| 10                  | Any other restrictions?                                                                                                                             | We may balance the potential benefits and risks for each request and then provide the data that could be shared.      |
