# Supplementary material for: Sclerostin aggravates cardiac remodeling after myocardial infarction by inhibition of Wnt/β-catenin signaling pathway
Source: PubMed Central journal article supplement — J Thorac Dis. 2022 May;14(5):1563–77. doi: 10.21037/jtd-22-473 (PMC9186236; doi:10.21037/jtd-22-473), 2022-05
Supplement: jtd-14-05-1563-supplementary.pdf [file jtd-14-05-1563-supplementary.pdf]

**Table S1** Echocardiographic data

| Echocardiographic indicators | Control    | Model      | SOST-overexpression | sh-SOST    |
|------------------------------|------------|------------|---------------------|------------|
| LVEDD, mm                    | 3.45±0.38  | 4.56±0.54  | 4.89±0.78           | 3.91±0.41  |
| LVESD, mm                    | 1.94±0.21  | 3.56±0.44  | 3.76±0.39           | 2.32±0.34  |
| EF, %                        | 76.41±4.53 | 40.21±5.32 | 36.75±3.89          | 58.84±8.76 |
| FS, %                        | 49.83±3.56 | 21.22±3.16 | 14.83±1.79          | 34.43±4.24 |

LVEDD, left ventricular end-diastolic dimension; LVESD, left ventricular end systolic dimension; EF, ejection fraction; FS, fractional shortening; SOST, sclerostin.
